# Supplementary material for: In vitro profiling and molecular dynamics simulation studies of berberine loaded MCM-41 mesoporous silica nanoparticles to prevent neuronal apoptosis
Source: Royal Society of Chemistry journal article supplement (doi:10.1039/d3na01142a), 2024-01-01
Supplement: d3na01142a1.pdf [file d3na01142a1.pdf]

## Supporting information

### ***In-vitro* profiling and molecular dynamics simulation studies of berberine loaded MCM-41 mesoporous silica nanoparticles to prevent neuronal apoptosis**

Anurag Kumar Singh<sup>1#</sup>, Snigdha Singh<sup>1#</sup>, Tarun Minocha<sup>2</sup>, Sanjeev Kumar Yadav<sup>2</sup>, Reema Narayan<sup>3</sup>, Usha Yogendra Nayak<sup>3</sup>, Santosh Kumar Singh<sup>1\*</sup>, Rajendra Awasthi<sup>4\*</sup>

<sup>1</sup>Centre of Experimental Medicine & Surgery, Institute of Medical Sciences, Banaras Hindu University, Varanasi - 221005, Uttar Pradesh, India

<sup>2</sup>Department of Zoology, Institute of Science, Banaras Hindu University, Varanasi 221005, India

<sup>3</sup>Department of Pharmaceutics, Manipal College of Pharmaceutical Sciences, Manipal Academy of Higher Education, Manipal, 576104, Karnataka, India

<sup>4</sup>Department of Pharmaceutical Sciences, School of Health Sciences & Technology, UPES University, Dehradun 248 007, Uttarakhand, India

#contributed equally

#### **\*Authors for correspondence**

Rajendra Awasthi, Ph.D.

Department of Pharmaceutical Sciences,

School of Health Sciences & Technology,

UPES University, Dehradun 248 007, Uttarakhand, India,

Email: awasthi02@gmail.com

M. No. +91-9495234530

Santosh Kumar Singh, Ph.D.

Centre of Experimental Medicine & Surgery,

Institute of Medical Sciences, Banaras Hindu University,

Varanasi 221005, Uttar Pradesh, India,

Email: singhsk71@yahoo.com

M. No. +91-9415389046

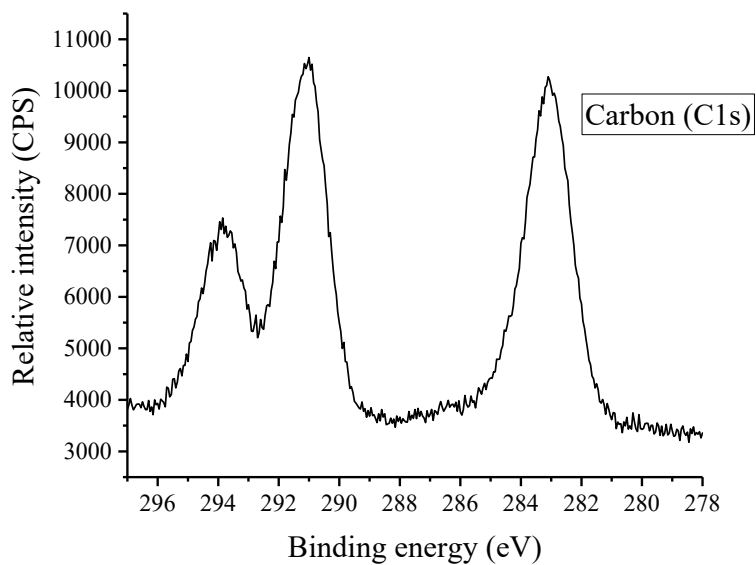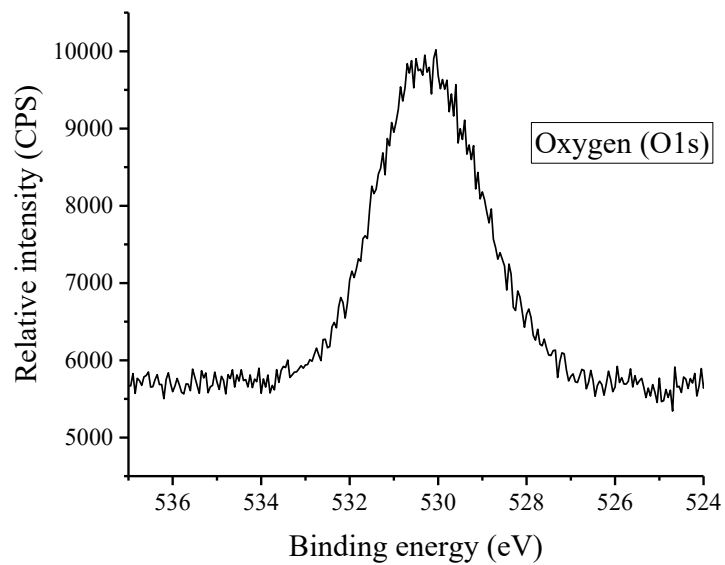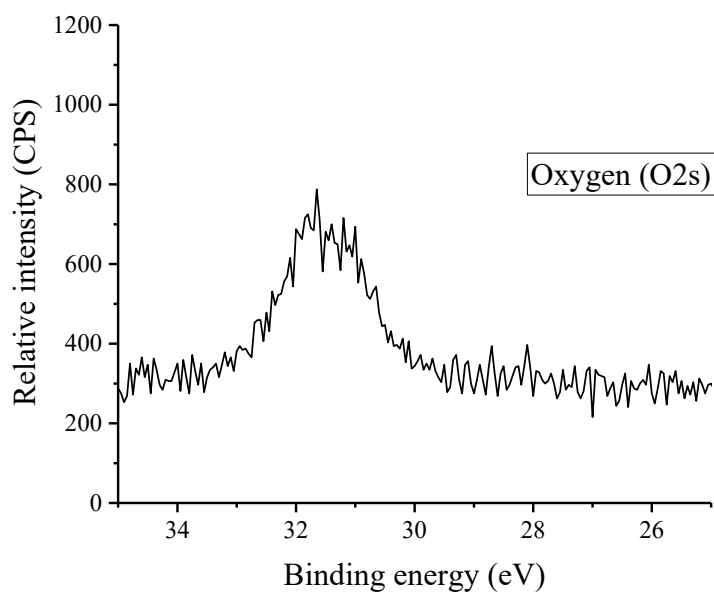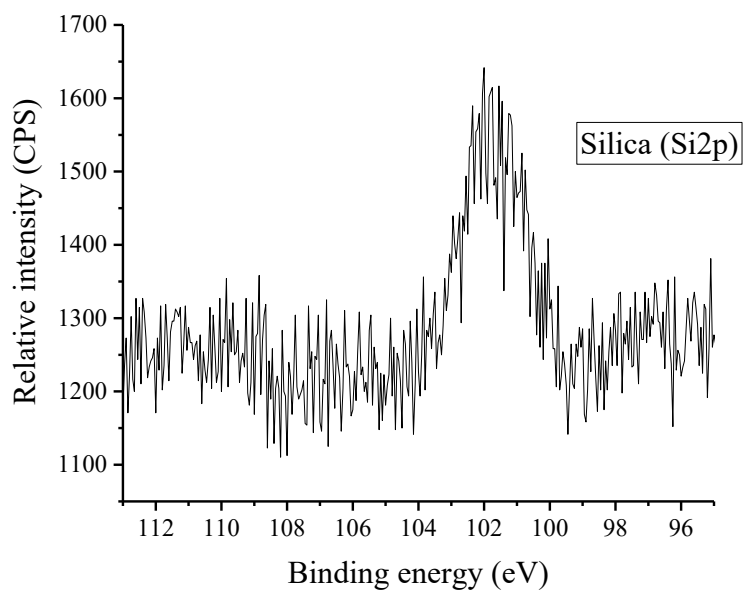

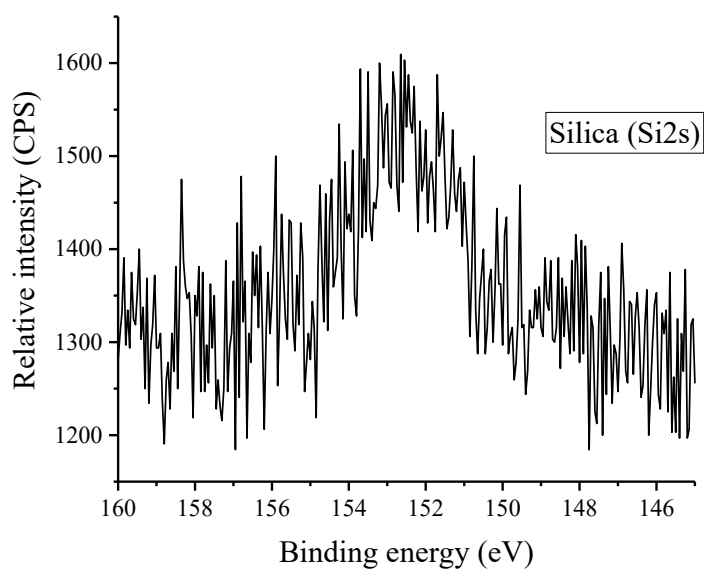

**Fig S1.** X-ray photoelectron spectroscopy (XPS) spectrum of MCM-41 (C1s, O1s, O2s, Si2p, Si2s).

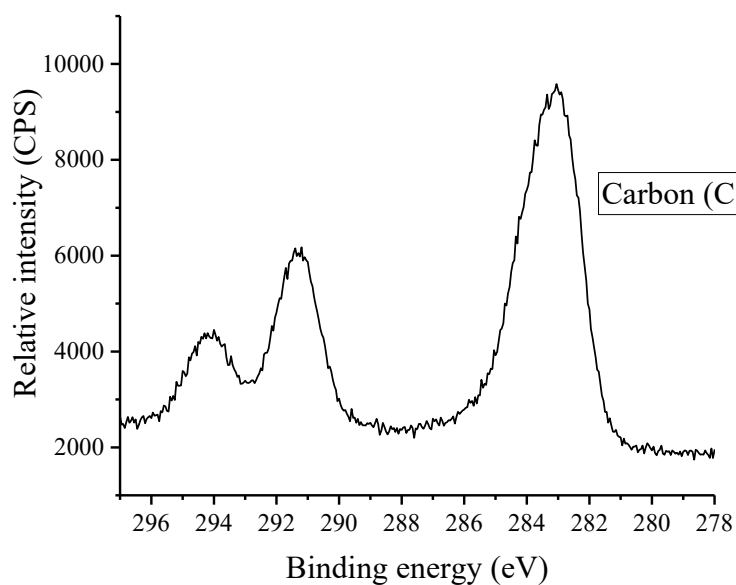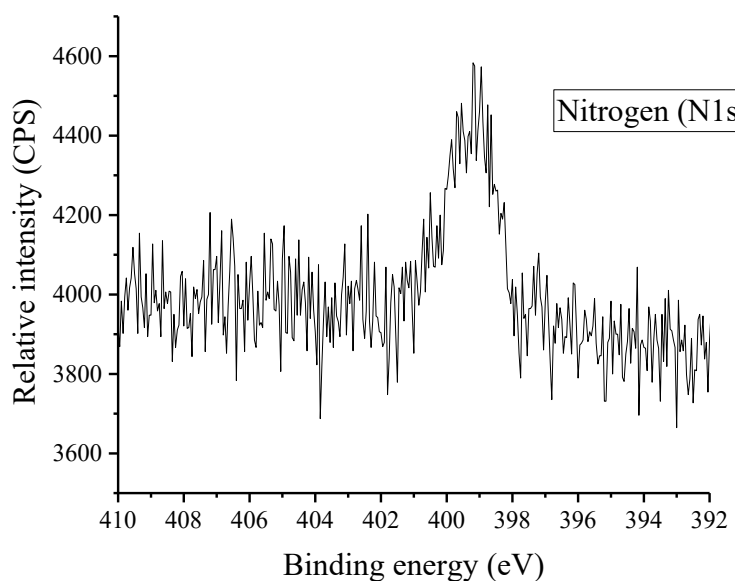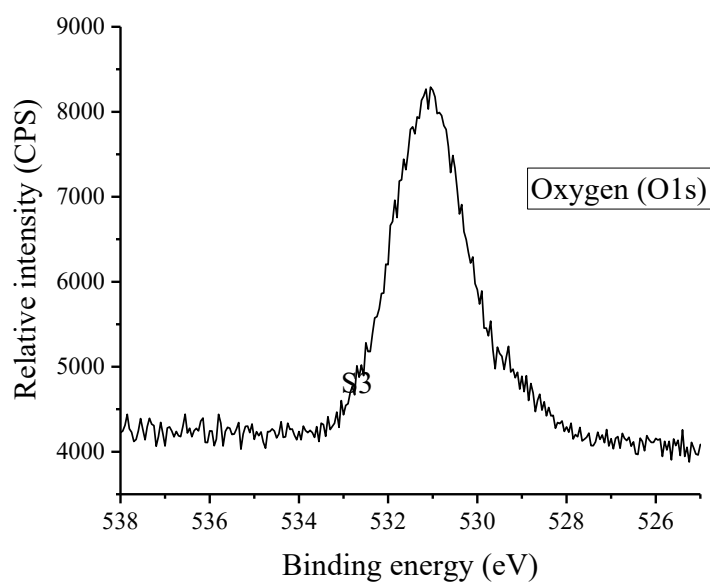

**Fig S2.** X-ray photoelectron spectroscopy (XPS) spectrum of BBR (C1s, N1s, O1s) (B).

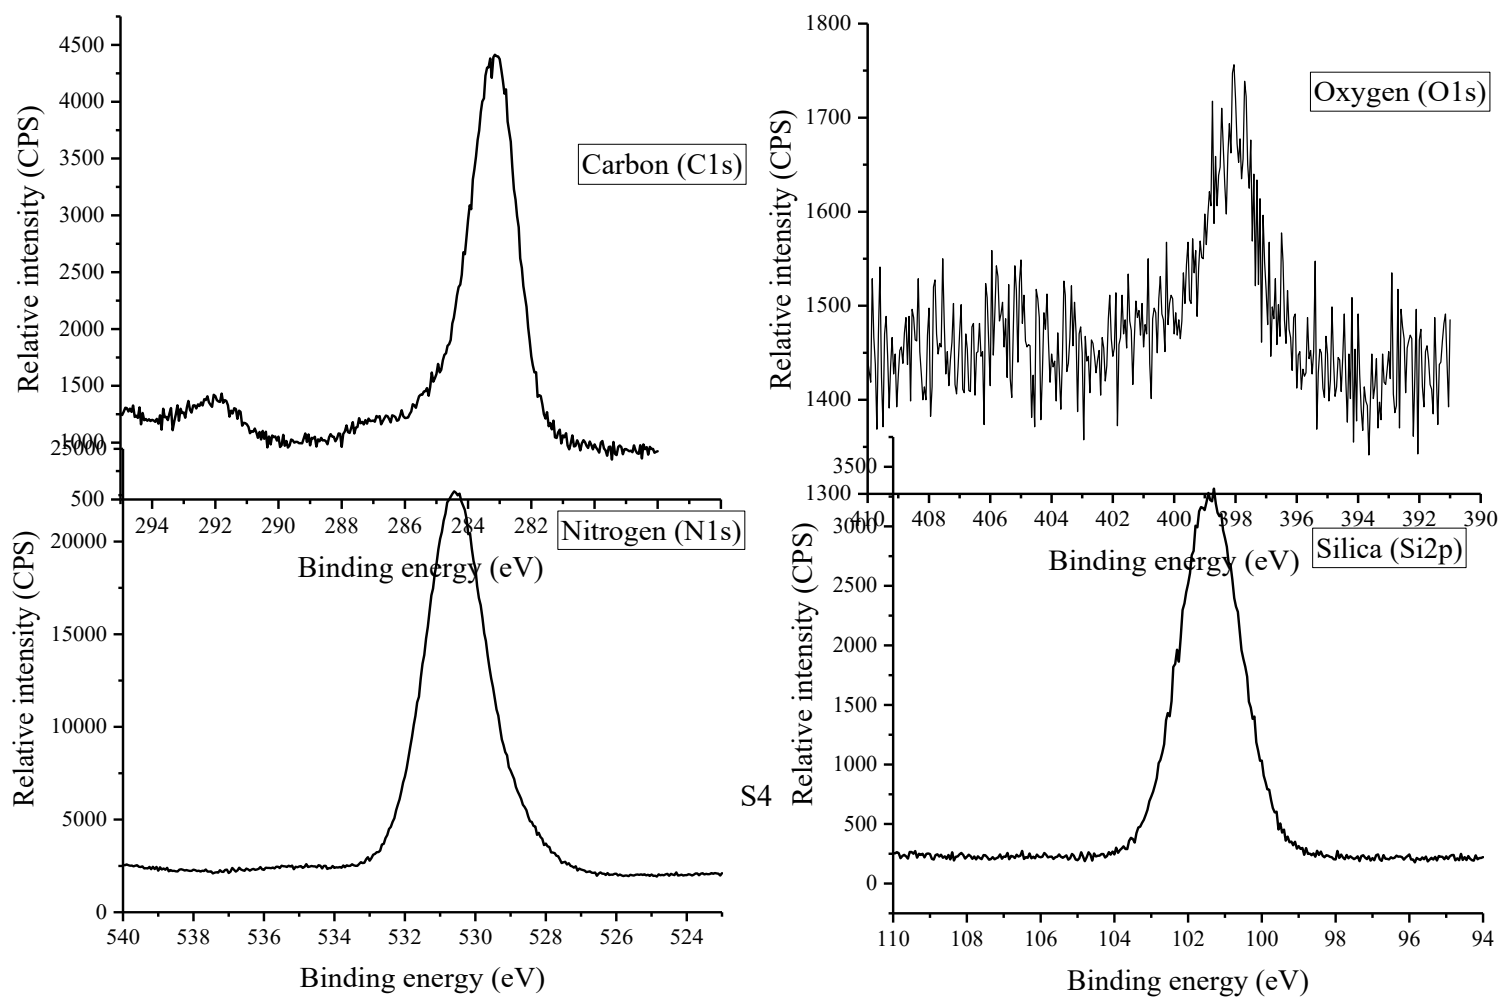

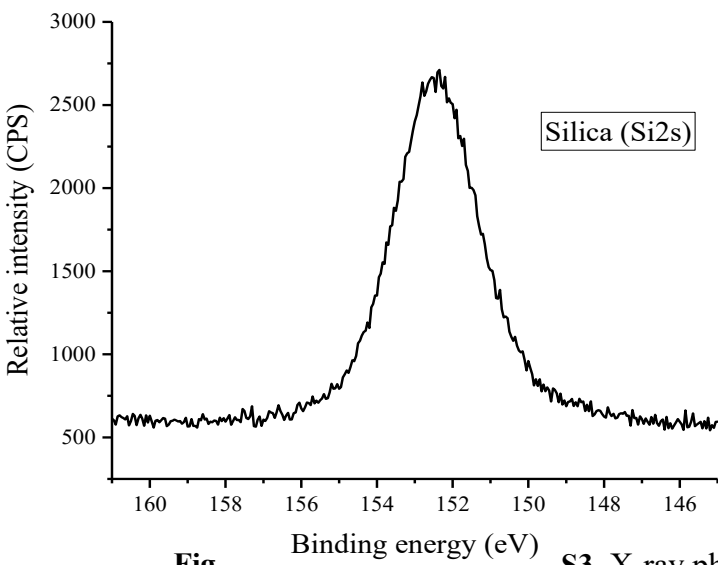

**Fig S3.** X-ray photoelectron spectroscopy (XPS) spectrum of MSNs-BBR (C1s, O1s, N1s, Si2p, Si2s) (C).

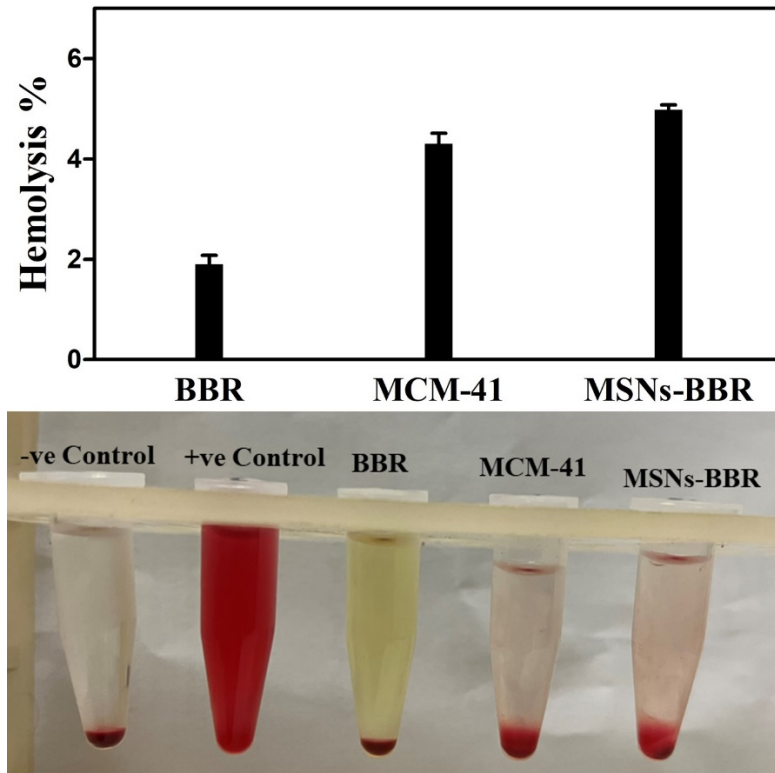

Fig. S4 Results of hemolytic toxicity study.
